# Supplementary material
Source: PubMed Central journal article supplement (PMC4655982)
Supplement: supp_M056812_Supplemental_Figure_1.pdf [file supp_M056812_Supplemental_Figure_1.pdf]

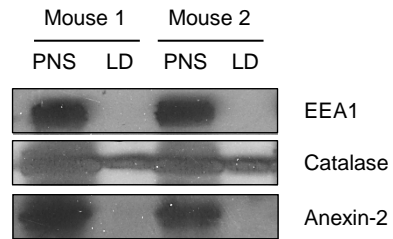

**Supplemental Figure 1.** Purification of hepatic lipid droplets. Equal amounts of protein from the post-nuclear supernatant (PNS) and LD fractions were analyzed by Western blotting with antibodies against protein markers of endosome (early endosome antigen-1, EEA1), peroxisome (catalase), and plasma membrane (anexin 2).
