# Supplementary material
Source: PubMed Central journal article supplement (PMC4655982)
Supplement: supp_M056812_Supplemental_Figure_2.pdf [file supp_M056812_Supplemental_Figure_2.pdf]

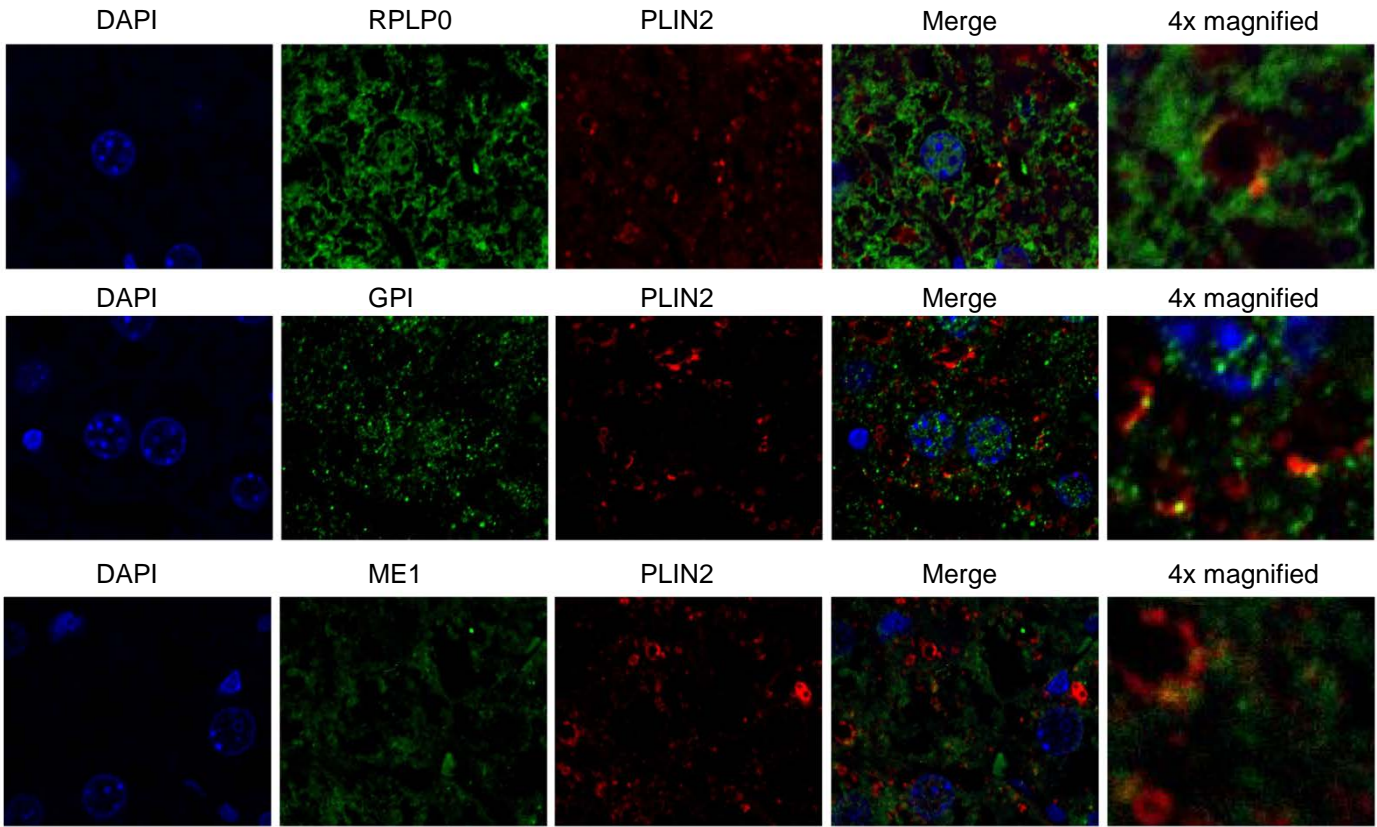

**Supplemental Figure 2.** Localization of proteins identified in LD-associated proteome. Single plane images of liver tissue sections from ND and HFD fed mice stained for DAPI or immunolabeled for PLIN2, RPLP0, GPI, or ME1. Last column shows 4x magnification.
