# Supplementary material
Source: PubMed Central journal article supplement (PMC4655982)
Supplement: supp_M056812_Supplemental_Figure_3.pdf [file supp_M056812_Supplemental_Figure_3.pdf]

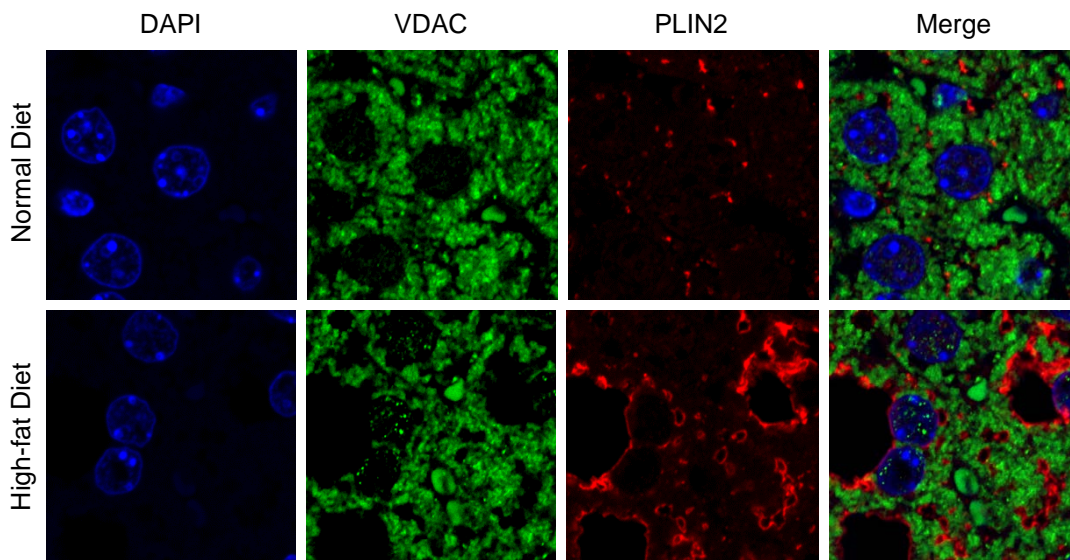

**Supplemental Figure 3.** High fat feeding does not affect VDAC staining. Single plane image of a liver tissue section from a ND and HFD fed mice stained for DAPI or immunolabeled for PLIN2 or VDAC.
