# Supplementary material
Source: PubMed Central journal article supplement (PMC4655982)
Supplement: supp_M056812_Supplemental_Figure_4.pdf [file supp_M056812_Supplemental_Figure_4.pdf]

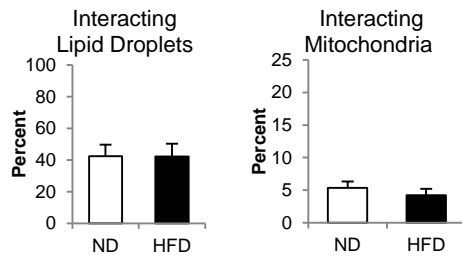

**Supplemental Figure 4.** High fat feeding does not affect LD and mitochondria interactions. Electron microscopy micrographs of normal and high-fat fed mouse livers were examined. All the mitochondria and LDs were quantified in 10 cells are a magnification of 15000-25000x. The percent of LDs interacting with mitochondria (left panel) and the percent of mitochondria interacting with LD (right panel) was calculated.
